# Supplementary material
Source: Research Square preprint supplement (doi:10.21203/rs.3.rs-9374625/v1)
Supplement: Supplementary file 1 [file e01710a2cf8a631cb050a8cb.docx]

**Supplementary Tables and Figures**

**Suppl. Table 1. Design of Experiments (DoE) parameters for generating the Ambr® 250 calibration dataset.** Summary of the systematically varied key process parameters used in the Design of Experiments (DoE) for the Ambr® 250 high-throughput mini-bioreactor batches. The implementation of DoE across temperature, pH, and dissolved oxygen (DO) ensured a highly diverse and comprehensive single-scale calibration dataset for building robust multivariate Raman models.

|  | AM01 | AM02 | AM03 | AM04 | AM05 | AM06 | AM07 | AM08 | AM11 | AM12 | AM13 | AM14 | AM15 | AM16 | AM17 | AM18 |
| --- | --- | --- | --- | --- | --- | --- | --- | --- | --- | --- | --- | --- | --- | --- | --- | --- |
| Prod. Temp. | -1 | -1 | -1 | 0 | 0 | +1 | +1 | +1 | N/A | | | | | | | |
| Prod. pH | -1 | 0 | +1 | -1 | +1 | -1 | 0 | +1 |
| Initial DO | N/A | | | | | | | | -1 | -1 | -1 | 0 | 0 | +1 | +1 | +1 |
| Prod. DO | -1 | 0 | +1 | 0 | +1 | -1 | 0 | +1 |

**Suppl. Table 2. Detailed performance metrics for standard single-scale and combined-scale Raman models.** Comprehensive overview of internal and external validation metrics, including latent variables (LV), R², Q², RMSEcv, RMSEP, and mean bias error of prediction (MBEP). The table contrasts the standard single-scale models with the combined-scale models across eight target variables, quantifying the reduction in prediction errors and biases achieved through the combined modeling approach.

|  | Std.single | combined | Std.single | combined | Std.single | combined | Std.single | combined | Std.single | combined | Std.single | combined | Std.single | combined |
| --- | --- | --- | --- | --- | --- | --- | --- | --- | --- | --- | --- | --- | --- | --- |
| n | | LV | | R2 | | Q2 | | RMSEcv(%) | | RMSEP(%) | | MBEP | |
| VCD | 273 | 297 | 1+2+0 | 1+2+0 | 0.95 | 0.95 | 0.94 | 0.94 | 5.6 | 5.9 | 6.6 | 5.9 | -0.0245 | N/A |
| Viability | 273 | 294 | 1+2+0 | 1+3+0 | 0.75 | 0.80 | 0.70 | 0.76 | 6.6 | 4.7 | 15.8 | 4.4 | -0.1330 | N/A |
| Glucose | 273 | 297 | 1+2+0 | 1+3+0 | 0.98 | 0.98 | 0.98 | 0.97 | 4.0 | 4.2 | 5.3 | 4.9 | 0.0292 | 0.0301 |
| Lactate | 273 | 297 | 1+2+0 | 1+3+0 | 0.98 | 0.98 | 0.97 | 0.97 | 3.4 | 3.9 | 6.4 | 5.0 | -0.0001 | 0.0169 |
| Glutamine | 273 | 297 | 1+4+0 | 1+5+0 | 0.92 | 0.97 | 0.86 | 0.95 | 8.1 | 4.5 | 18.0 | 7.9 | -0.1618 | N/A |
| Glutamate | 273 | 297 | 1+3+0 | 1+4+0 | 0.97 | 0.97 | 0.96 | 0.95 | 4.3 | 4.5 | 13.5 | 8.4 | 0.1160 | -0.0612 |
| Ammonia | 273 | 297 | 1+3+0 | 1+4+0 | 0.96 | 0.96 | 0.95 | 0.95 | 6.0 | 6.1 | 10.7 | 8.9 | -0.0698 | -0.0407 |
| LDH | 218 | 235 | 1+2+0 | 1+2+0 | 0.91 | 0.91 | 0.89 | 0.90 | 5.9 | 5.4 | 10.7 | 5.8 | 0.0882 | -0.0381 |

**
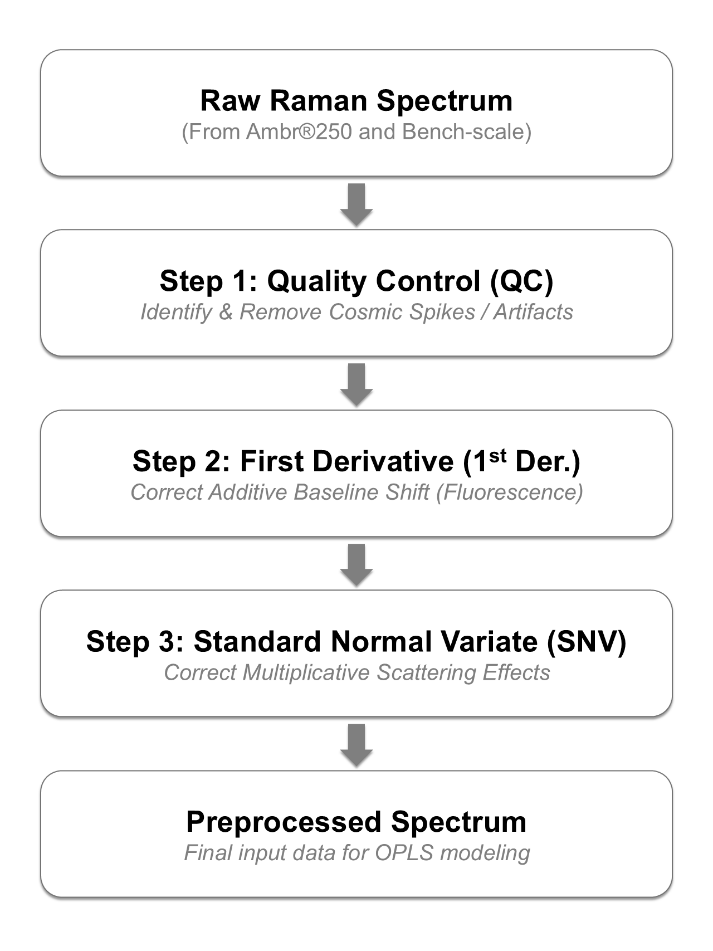
**

**Suppl. Figure 1. Workflow of the standardized Raman spectral data preprocessing and quality control.** Step-by-step schematic of the preprocessing workflow applied to the raw Raman spectra. Prior to baseline correction and normalization, all acquired spectra underwent a standardized quality control procedure to identify and remove cosmic spikes and other pronounced spectral artifacts that are unrelated to chemical composition.

**
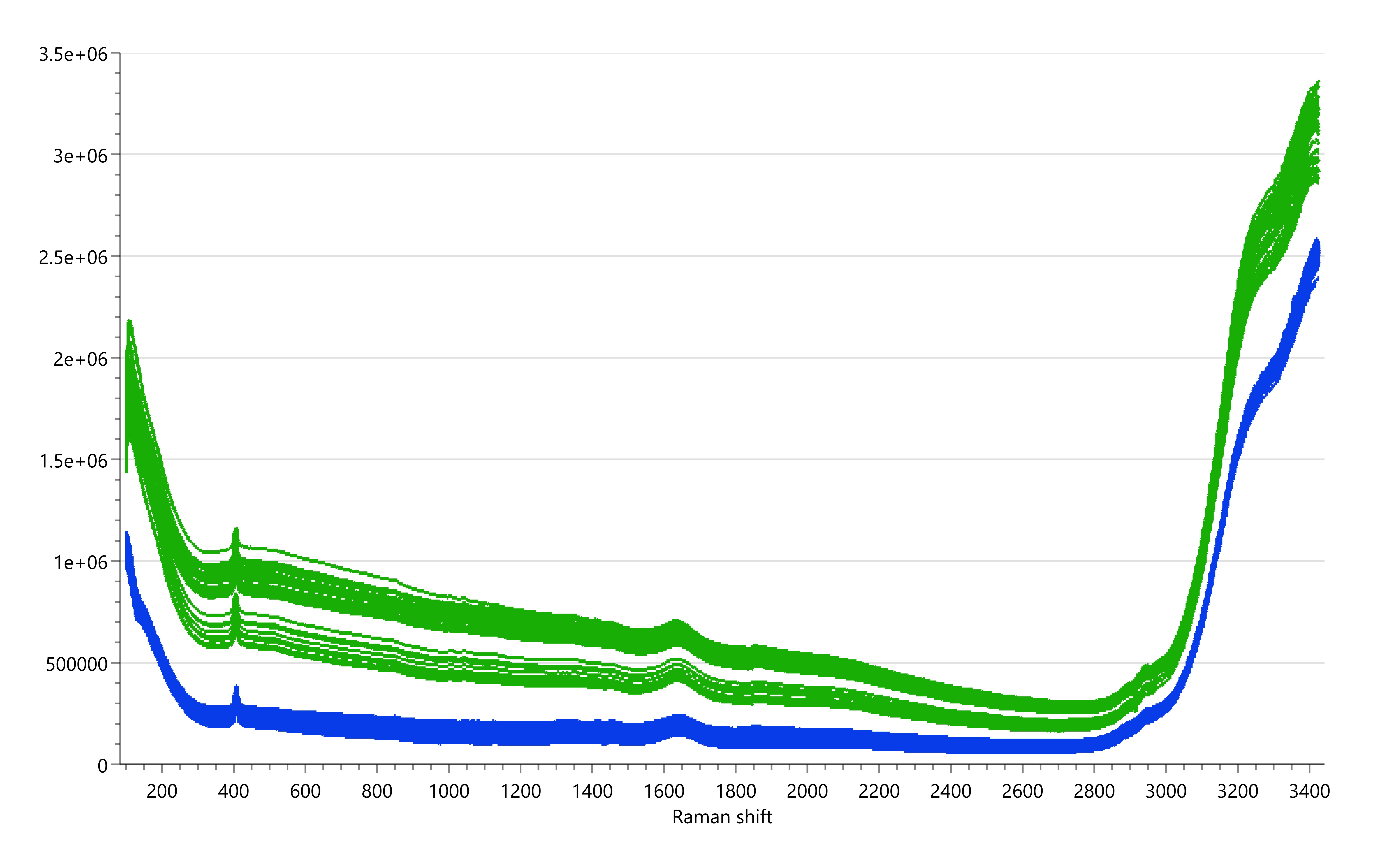
**

**Suppl. Figure 2.** **Raw Raman spectra from Ambr® 250 and bench-scale bioreactors.** Raw Raman spectra acquired from the Ambr® 250 high-throughput system (blue lines) and the bench-scale bioreactors (green lines). The spectral overlay reveals distinct differences in baseline levels, fluorescence background, and overall signal intensity between the two systems. These variations represent the cross-condition challenge inherently present during model transfer, underscoring the necessity for robust spectral preprocessing.
